# Supplementary material for: Construction of Photoelectrochemical DNA Biosensors Based on TiO2@Carbon Dots@Black Phosphorous Quantum Dots
Source: MDPI journal article supplement (doi:10.3390/mi12121523), 2021-12-08
Supplement: s1 [file s1]

# Construction of photoelectrochemical DNA biosensors based on $\text{TiO}_2$ @carbon dots@black phosphorous quantum dots

Kai Song<sup>1</sup>, Jianwei Lin<sup>1,2</sup>, Yafeng Zhuang<sup>1,2</sup>, Zhizhong Han<sup>1,2,\*</sup> and Jinghua Chen<sup>1,2</sup>

<sup>1</sup>School of Pharmacy, Fujian Medical University, Fuzhou, Fujian 350122, China

<sup>2</sup>Fujian Key Laboratory of Drug Target Discovery and Structural and Functional Research, Fuzhou 350122, China

\* Correspondence: Corresponding author

E-mail: zzhan@fjmu.edu.cn

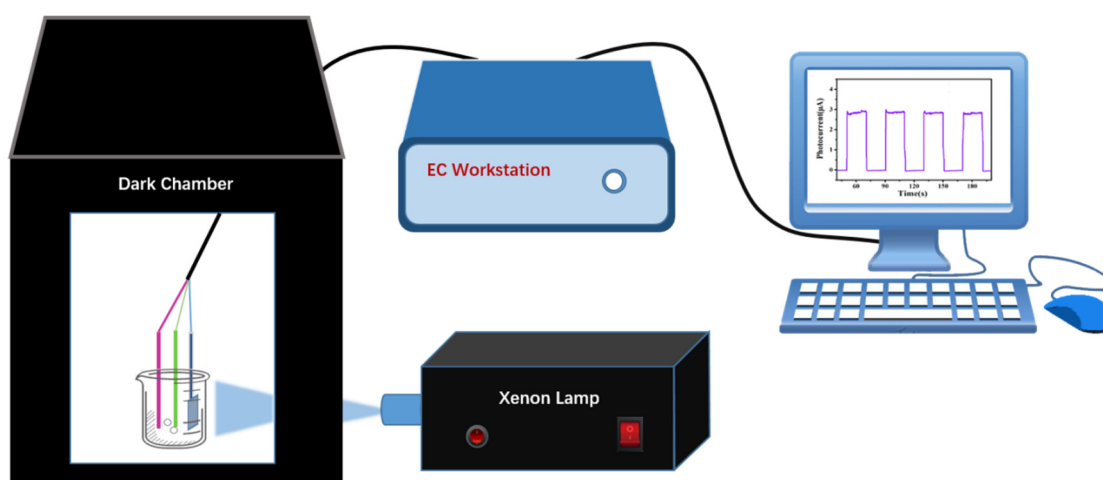

**Figure S1.** Schematic illustration of the operation system for the PEC detection.

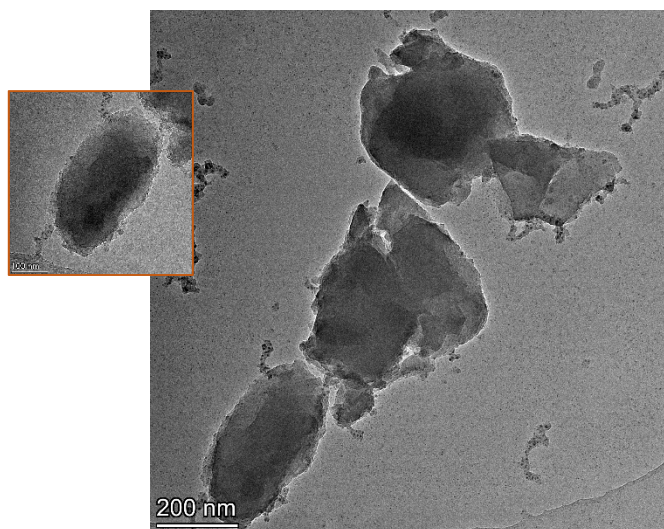

**Figure S2.** TEM image of the  $\text{TiO}_2$ @CDs@BPQDs nanocomposites.
